# Supplementary material
Source: Research Square preprint supplement (doi:10.21203/rs.3.rs-9819660/v1)
Supplement: Supplementary file 1 [file 71f0e1bd3878c514369642a8.xlsx]

## Sheet: Supplementary Table_S1
Supplementary table S1 The positivity rate of vector-borne pathogens detected in ticks infesting dogs from Chad based on demographics
	Geographic region			Tick species
	South	North	Central	Rhipicephalus linnaei	Rhipicephalus muhsamae	Amblyomma variegatum	Haemaphyalis leachi
	(Total No. = 192)	(Total No. = 170)	(Total No. = 255)	(Total No. = 430)	(Total No. = 177)	(Total No. = 6)	(Total No. = 4)
	No. (%)	No. (%)	No. (%)	No. (%)	No. (%)	No. (%)	No. (%)
Pathogens
Anaplasma spp.	9 (4.7)	5 (2.9)	9 (3.5)	18 (4.2)	4 (2.3)	1 (16.7)	-
Anaplasma platys	5 (2.6)	8 (4.7)	14 (5.5)	27 (6.3)	-	-	-
Anaplasma phagocytophilum	3 (1.6)	2 (1.2)	2 (0.8)	7 (1.6)	-	-	-
Babesia caballi	1 (0.5)	-	-	-	1 (0.6)	-	-
Cand. Mycoplasma haematoparvum	-	2 (1.2)	-	2 (0.5)	-	-	-
Cand. Mycoplasma haemominutum	-	2 (1.2)	-	2 (0.5)	-	-	-
Coxiella-like endosymbionts	5 (2.6)	16 (9.4)	12 (4.7)	-	32 (18.1)	-	1 (25.0)
Ehrlichia canis	6 (3.1)	18 (10.6)	28 (11.0)	50 (11.6)	2 (1.1)	-	-
Hepatozoon canis	79 (41.1)	95 (55.9)	120 (47.1)	230 (53.5)	60 (33.9)	3 (16.7)	1 (25.0)
Hepatozoon felis	1 (0.5)	-	-	-	1 (0.6)	-	-
Mycoplasma haemocanis	-	1 (0.6)	4 (1.6)	5 (1.2)	-	-	-
Rickettsia conorii	-	1 (0.6)	1 (0.4)	-	2 (1.1)	-	-
Rickettsia massiliae	-	1 (0.6)	-	-	1 (0.6)	-	-
Rickettsia spp.	7 (3.6)	7 (4.1)	15 (5.9)	17 (4.0)	8 (4.5)	3 (16.7)	1 (25.0)
Cand. M. haematoparvum = Candidatus M. haematoparvum, Cand. M. haemominutum = Candidatus M. haematoparvum. Total ticks tested = 618, a single Hyalomma truncatum was included in the study, testing negative for any pathogen, and was not included in the statistics and table.
